# Supplementary material
Source: publisher figshare collection journal article supplement (https://acs.figshare.com/ndownloader/files/4647304)
Supplement: Supplementary file 1 [file 4647304]

## <Supporting Information>

### Synthesis and Anti-HIV Activity of 4'-Substituted 4'-Thiothymidines: A New

#### Entry Based on Nucleophilic Substitution of 4'-Acetoxy Group

*Kazuhiro Haraguchi,\* Hisashi Shimada, Hiromichi Tanaka, Takayuki Hamasaki,*

*Masanori Baba, Elizabeth A. Gullen, Ginger E. Dutschman,*

*and Yung-Chi Cheng*

## CONTENTS

Page S2 – S6 General Experimental Section and procedures for compounds **8-13**.

Page S7 – S9 Table for elemental analysis of compounds **8-37**.

**Chemistry** Melting points are uncorrected.  $^1\text{H}$  and  $^{13}\text{C}$  NMR spectra were recorded either at 400 MHz or at 500 MHz. Chemical shifts are reported relative to  $\text{Me}_4\text{Si}$ . Mass spectra (MS) were taken in FAB mode with *m*-nitrobenzyl alcohol as a matrix. Column chromatography was carried out on silica gel. Thin-layer chromatography (TLC) was performed on silica gel. When necessary, analytical samples were purified by high performance liquid chromatography (HPLC). THF was distilled from benzophenone ketyl.

#### **1-[2-Deoxy-2-iodo-3,5-*O*-(1,1,3,3-tetraisopropylidisiloxane-1,3-diyl)-4-thio- $\beta$ -D-ribofuranosyl]thymine (8)**

To an  $\text{CH}_3\text{CN}$  (30.0 mL) solution of bis-*O*-TMS-thymine, prepared from thymine (4.40 g, 34.88 mmol) and *N,O*-bis-trimethylsilylacetamide (17.21 mL, 69.75 mmol), was added an  $\text{CH}_3\text{CN}$  (40 mL)/ $\text{CH}_2\text{Cl}_2$  (20 mL) solution of **7** (8.71 g, 23.25 mmol). To the

mixtute was added *N*-iodosuccimide (7.85 g, 34.88 mmol) at 0 °C under Ar atmosphere. The reaction mixture was stirred for 5 h, and was partitioned between CHCl<sub>3</sub>/saturated aq NaHCO<sub>3</sub>-0.2 M Na<sub>2</sub>S<sub>2</sub>O<sub>3</sub>. Column chromatography (hexane/AcOEt = 3/1) of the organic layer gave **8** (10.86 g, 75%) as foam: UV (MeOH) $\lambda_{\text{max}}$  270 nm ( $\epsilon$ 11500), $\lambda_{\text{min}}$  236 nm ( $\epsilon$ 3000); <sup>1</sup>H NMR (CDCl<sub>3</sub>) $\delta$  0.96-1.12 (32H, m), 1.93 (3H, d, *J* = 1.2 Hz), 3.37 (1H, dd, *J* = 4.4 and *J* = 8.8 Hz), 3.68 (1H, ddd, *J* = 8.8, *J* = 2.0 and *J* = 3.2 Hz), 4.01 (1H, dd, *J* = 2.0 and *J* = 13.2 Hz), 4.12 (1H, dd, *J* = 3.2 and *J* = 13.2 Hz), 4.47 (1H, dd, *J* = 1.6 and *J* = 4.4 Hz), 6.07 (1H, d, *J* = 1.6 Hz), 8.07 (1H, d, *J* = 1.2 Hz), 8.44 (1H, br); NOE experiment: H-1'/H-4' (1.0%), H-6/H-3' (7.6%), H-6/H-5'a (0.3%) and H-6/H-2' (1.7%); <sup>13</sup>C NMR (CDCl<sub>3</sub>) $\delta$ : 12.6, 12.7, 13.1, 13.2, 13.4, 16.91, 16.95, 16.97, 17.06, 17.3, 17.4, 17.5, 38.7, 54.0, 58.2, 67.2, 71.4, 76.7, 110.5, 136.3, 150.4, 163.3. FAB-MS (*m/z*) 627 (M<sup>+</sup>+H). *Anal.* Calcd for C<sub>22</sub>H<sub>39</sub>IN<sub>2</sub>O<sub>5</sub>SSi<sub>2</sub>: C, 42.16; H, 6.27; N, 4.47. Found: C, 42.25; H, 6.28; N, 4.42.

**1-[2-Deoxy-3,5-*O*-(1,1,3,3-tetraisopropylidisiloxane-1,3-diyl)-4-thio- $\beta$ -D-ribo-furanosyl]thymine (**9**)**

To a toluene (70 mL) solution of **8** (10.76 g, 17.17 mmol) was added Bu<sub>3</sub>SnH (5.1 mL, 18.89 mmol) and Et<sub>3</sub>B (1 M THF solution) (1.7 mL, 1.7 mmol) at -70 °C under Ar atmosphere. The reaction mixture was stirred under O<sub>2</sub> atmosphere at -70 °C for 1.5 h. The reaction mixture was chromatographed on silica gel column (hexane/AcOEt = 2/1) to give **9** (8.56 g, 100%) as solid: mp 147-149 °C; UV (MeOH) $\lambda_{\text{max}}$  271 nm ( $\epsilon$ 10900), $\lambda_{\text{min}}$

$\lambda_{\min}$  242 nm ( $\epsilon$ 5200);  $^1\text{H}$  NMR ( $\text{CDCl}_3$ )  $\delta$ 1.00-1.15 (32H, m), 1.93 (3H, d,  $J$  = 1.2 Hz), 2.26 (1H, dd,  $J$  = 13.6 and  $J$  = 6.0 Hz), 2.48 (1H, ddd,  $J$  = 8.0,  $J$  = 13.6 and  $J$  = 12.0 Hz), 3.33 (1H, ddd,  $J$  = 9.2,  $J$  = 1.6 and  $J$  = 3.2 Hz), 3.96 (1H, dd,  $J$  = 1.6 and  $J$  = 12.8 Hz), 4.13 (1H, dd,  $J$  = 3.2 and  $J$  = 12.8 Hz), 4.46 (1H, ddd,  $J$  = 6.0,  $J$  = 12.0 and  $J$  = 9.2 Hz), 6.05 (1H, d,  $J$  = 8.0 Hz), 7.89 (1H, d,  $J$  = 1.2 Hz), 8.42 (1H, br);  $^{13}\text{C}$  NMR ( $\text{CDCl}_3$ )  $\delta$ : 12.4, 12.5, 12.9, 13.2, 13.4, 16.89, 16.97, 17.06, 17.14, 17.3, 17.4, 17.5, 43.0, 54.9, 57.1, 58.1, 70.9, 110.8, 136.6, 150.6, 163.5. FAB-MS ( $m/z$ ) 501 ( $\text{M}^+ + \text{H}$ ). *Anal.* Calcd for  $\text{C}_{22}\text{H}_{40}\text{N}_2\text{O}_5\text{SSi}_2$ : C, 52.76; H, 8.05; N, 5.59. Found: C, 52.58; H, 8.17; N, 5.51.

**1-[2-Deoxy-3,5-di-*O*-acetyl-4-thio- $\beta$ -D-ribofuranosyl]thymine (10)**

To a THF (70 mL) solution of **9** (8.52 g, 17.01 mmol) was added  $\text{Ac}_2\text{O}$  (8.0 mL, 85.05 mmol) and  $\text{Bu}_4\text{NF}$  (1 M THF solution) (51 mL, 51.03 mmol) at 0 °C under Ar atmosphere. After stirring for 5 h at rt, the reaction mixture was partitioned between  $\text{CHCl}_3$ /saturated aq  $\text{NaHCO}_3$ . Silica gel column chromatography (hexane/ $\text{AcOEt}$  = 1/2) of the organic layer gave **10** (5.41 mg, 93%) as foam: UV (MeOH)  $\lambda_{\max}$  270 nm ( $\epsilon$ 9900),  $\lambda_{\min}$  236 nm ( $\epsilon$ 2500);  $^1\text{H}$  NMR ( $\text{CDCl}_3$ )  $\delta$ 1.98 (3H, d,  $J$  = 1.2 Hz), 2.13 and 2.15 (6H, each as s), 2.20 (1H, ddd,  $J$  = 9.2 and  $J$  = 13.6 and  $J$  = 4.4 Hz), 2.54 (1H, ddd,  $J$  = 6.4,  $J$  = 13.6 and  $J$  = 2.4 Hz), 3.71 (1H, ddd,  $J$  = 2.0,  $J$  = 7.6 and  $J$  = 6.0 Hz), 4.20 (1H, dd,  $J$  = 7.6 and  $J$  = 11.6 Hz), 4.37 (1H, dd,  $J$  = 6.0 and  $J$  = 11.6 Hz), 5.38 (1H, ddd,  $J$  = 4.4,  $J$  = 2.4 and  $J$  = 2.0 Hz), 6.56 (1H, dd,  $J$  = 9.2 and  $J$  = 6.4 Hz), 7.53 (1H, d,  $J$  = 1.2 Hz), 8.66 (1H, br);  $^{13}\text{C}$  NMR ( $\text{CDCl}_3$ )  $\delta$ 12.7, 20.8, 21.0, 39.4, 52.6, 61.1, 64.9, 76.4, 112.3, 135.4,

150.7, 163.2, 170.1, 170.5. FAB-MS ( $m/z$ ) 343 ( $M^+ + H$ ). *Anal.* Calcd for  $C_{14}H_{18}N_2O_6S$ : C, 49.11; H, 5.30; N, 8.18. Found: C, 49.14; H, 5.33; N, 7.93.

**1-[-2,5-Dideoxy-5-iodo-4-thio- $\beta$ -D-ribofuranosyl]thymine (11)**

Compound **10** (5.94 g, 17.35 mmol) was treated with  $NH_3/MeOH$  (200 mL) at rt for 12 h. The reaction mixture was evaporated to dryness and the residue was dried in vacuo overnight. To a dioxane (120 mL) solution of the residue was added pyridine (3.5 mL, 43.38 mmol),  $PPh_3$  (9.1 g, 34.7 mmol) and iodine (8.81 g, 34.7 mmol) at 0 °C under Ar atmosphere. The reaction mixture was stirred at rt for 10 h and chromatographed on silica gel (4% MeOH in  $CH_2Cl_2$ ) to give **11** (5.16 g, 81%) as solid: mp 184-186 °C; UV (MeOH)  $\lambda_{max}$  269 nm ( $\epsilon$ 11300),  $\lambda_{min}$  236 nm ( $\epsilon$ 4800);  $^1H$  NMR ( $CDCl_3$ )  $\delta$  1.91 (3H, d,  $J$  = 1.2 Hz), 2.29–2.38 (2H, m), 3.58 (1H, br), 3.58 (2H, br), 4.56 (1H, dd,  $J$  = 2.4 and  $J$  = 3.6), 6.48 (1H, dd,  $J$  = 8.0 and  $J$  = 7.6 Hz), 7.74 (1H, d,  $J$  = 1.2 Hz), 8.66 (1H, br);  $^{13}C$  NMR ( $DMSO-d_6$ )  $\delta$ : 11.0, 12.0, 58.3, 61.2, 75.7, 95.4, 110.3, 136.7, 150.6, 163.4. FAB-MS ( $m/z$ ) 369 ( $M^+ + H$ ). *Anal.* Calcd for  $C_{10}H_{13}IN_2O_3S$ : C, 32.62; H, 3.56; N, 7.61. Found: C, 32.91; H, 3.36; N, 7.23.

**1-[3-*O*-Acetyl-2,5-dideoxy- $\beta$ -D-glycero-4-eno-4-thiofuranosyl]thymine (12)**

To an  $CH_3CN$  (30 mL) suspension of **11** (5.16 g, 14.01 mmol) was added *i*- $Pr_2NEt$  (7.3 mL, 42.03 mmol),  $Ac_2O$  (2.6 mL, 28.02 mmol) and DMAP (856.4 mg, 7.01 mmol) at 0 °C under Ar atmosphere. After stirring for 18 h at rt, the reaction mixture was partitioned between  $CHCl_3$ /saturated aq  $NaHCO_3$ . Silica gel column chromatography

(5% MeOH in CH<sub>2</sub>Cl<sub>2</sub>) of the organic layer gave the 5'-*O*-acetate. To an CH<sub>3</sub>CN (35 mL) solution of the acetate was added DBN (4.1 mL, 33.48 mmol) at 0 °C under Ar atmosphere. The reaction mixture was stirred at rt for 24 h, neutralized with acetic acid, and partitioned between CHCl<sub>3</sub>/sat. NaHCO<sub>3</sub>. The organic layer was chromatographed on a silica gel column (3% MeOH in CH<sub>2</sub>Cl<sub>2</sub>) to give **12** (3.29 g, 83%) as foam: <sup>1</sup>H NMR (CDCl<sub>3</sub>) δ 1.97 (3H, d, *J* = 0.8 Hz), 2.12 (3H, s), 2.20 (1H, ddd, *J* = 8.4, *J* = 13.6 and *J* = 4.8 Hz), 2.57 (1H, ddd, *J* = 6.4, *J* = 13.6 and *J* = 3.2 Hz), 5.26 (1H, s), 5.52 (1H, s), 5.85 (1H, dd, *J* = 4.8 and *J* = 2.4 Hz), 6.77 (1H, dd, *J* = 8.4 and *J* = 6.4 Hz), 7.35 (1H, d, *J* = 0.8 Hz), 9.31 (1H, br); <sup>13</sup>C NMR (CDCl<sub>3</sub>) δ: 12.1, 20.9, 61.3, 77.0, 108.9, 110.7, 136.3, 145.6, 150.6, 163.4, 169.6, 170.3. FAB-MS (*m/z*) 283 (M<sup>+</sup>+H). High resolution FAB-MS (*m/z*): calcd for C<sub>12</sub>H<sub>15</sub>N<sub>2</sub>O<sub>4</sub>S : 283.0753 (M<sup>+</sup> + H). Found: 283.0745.

**1-[3-*O*-(*t*-Butyldimethylsilyl)-2,5-dideoxy-β-D-glycero-4-eno-4-thiofuranosyl]thymine (13)**

Compound **12** (3.5 g, 12.40 mmol) was treated with NH<sub>3</sub>/MeOH (80 mL) for 10 h at rt. The reaction mixture was evaporated and dried in vacuo overnight. To a DMF (40 mL) solution of the residue was added imidazole (2.5 g, 37.2 mmol) and *t*-butyldimethylsilyl chloride (3.7 g, 24.8 mmol) at 0 °C under Ar atmosphere. After stirring for 10 h at rt, the reaction mixture was partitioned between AcOEt/H<sub>2</sub>O. Silica gel column chromatography (hexane/AcOEt = 3/1) of the organic layer to give **13** (3.15 g, 72%) as foam: UV (MeOH) λ<sub>max</sub> 268 nm (ε11000), λ<sub>min</sub> 251 nm (ε300). <sup>1</sup>H NMR (CDCl<sub>3</sub>) δ 0.11

(6H, s), 0.91 (9H, s), 1.96 (3H, d,  $J = 1.2$  Hz), 2.04 (1H, ddd,  $J = 7.0$ ,  $J = 13.0$  and  $J = 4.4$  Hz), 2.40 (1H, ddd,  $J = 6.2$ ,  $J = 13.0$  and  $J = 4.8$  Hz), 4.76 (1H, dd,  $J = 4.4$  and  $J = 4.8$  Hz), 5.12 (1H, d,  $J = 1.2$  Hz), 5.32 (1H, d,  $J = 1.2$  Hz), 6.62 (1H, dd,  $J = 7.0$  and  $J = 6.2$  Hz), 7.37 (1H, d,  $J = 1.2$  Hz), 8.47 (1H, br);  $^{13}\text{C}$  NMR ( $\text{CDCl}_3$ ) $\delta$ : -4.7, -4.6, 12.7, 18.0, 25.7, 44.2, 61.4, 76.6, 106.2, 111.9, 135.8, 149.1, 150.5, 163.4. FAB-MS ( $m/z$ ) 355 ( $\text{M}^+ + \text{H}$ ). *Anal.* Calcd for  $\text{C}_{16}\text{H}_{26}\text{N}_2\text{O}_3\text{SSi}$ : C, 54.20; H, 7.39; N, 7.90. Found: C, 54.28; H, 7.52; N, 7.79.

*Microanalytical Data*

| no | Empirical Formula                                                               | Calcd. |      |      | Found |      |      |
|----|---------------------------------------------------------------------------------|--------|------|------|-------|------|------|
|    |                                                                                 | C      | H    | N    | C     | H    | N    |
| 8  | C <sub>22</sub> H <sub>39</sub> IN <sub>2</sub> O <sub>5</sub> SSi <sub>2</sub> | 42.16  | 6.27 | 4.47 | 42.25 | 6.28 | 4.42 |
| 9  | C <sub>22</sub> H <sub>40</sub> N <sub>2</sub> O <sub>5</sub> SSi <sub>2</sub>  | 52.76  | 8.05 | 5.59 | 52.58 | 8.17 | 5.51 |
| 10 | C <sub>14</sub> H <sub>18</sub> N <sub>2</sub> O <sub>6</sub> S                 | 49.11  | 5.30 | 8.18 | 49.14 | 5.33 | 7.93 |
| 11 | C <sub>10</sub> H <sub>13</sub> IN <sub>2</sub> O <sub>3</sub> S                | 32.62  | 3.56 | 7.61 | 32.91 | 3.36 | 7.23 |
| 13 | C <sub>16</sub> H <sub>26</sub> N <sub>2</sub> O <sub>3</sub> SSi               | 54.20  | 7.39 | 7.90 | 54.28 | 7.52 | 7.79 |
| 14 | C <sub>20</sub> H <sub>32</sub> N <sub>2</sub> O <sub>7</sub> SSi               | 50.83  | 6.82 | 5.93 | 50.93 | 6.86 | 5.87 |
| 15 | C <sub>20</sub> H <sub>32</sub> N <sub>2</sub> O <sub>7</sub> SSi               | 50.83  | 6.82 | 5.93 | 50.83 | 6.88 | 5.83 |

|       |                                                                       |       |      |       |       |      |       |
|-------|-----------------------------------------------------------------------|-------|------|-------|-------|------|-------|
| 16    | $\text{C}_{16}\text{H}_{26}\text{N}_2\text{O}_4\text{SSi}$            | 51.86 | 7.07 | 7.56  | 51.98 | 7.15 | 7.49  |
| <hr/> |                                                                       |       |      |       |       |      |       |
| 17a   | $\text{C}_{24}\text{H}_{34}\text{N}_2\text{O}_5\text{S}_2\text{Si}$   | 55.14 | 6.56 | 5.36  | 54.79 | 6.54 | 5.32  |
| <hr/> |                                                                       |       |      |       |       |      |       |
| 20b   | $\text{C}_{17}\text{H}_{30}\text{N}_2\text{O}_5\text{SSi}$            | 50.72 | 7.51 | 6.96  | 50.81 | 7.60 | 6.81  |
| <hr/> |                                                                       |       |      |       |       |      |       |
| 21a   | $\text{C}_{21}\text{H}_{34}\text{N}_2\text{O}_5\text{SSi}$            | 55.48 | 7.54 | 6.16  | 55.68 | 7.75 | 5.99  |
| <hr/> |                                                                       |       |      |       |       |      |       |
| 23    | $\text{C}_{28}\text{H}_{46}\text{N}_2\text{O}_4\text{S}_2\text{Si}_2$ | 56.52 | 7.79 | 4.71  | 56.47 | 7.85 | 4.66  |
| <hr/> |                                                                       |       |      |       |       |      |       |
| 24    | $\text{C}_{24}\text{H}_{44}\text{N}_2\text{O}_6\text{SSi}_2$          | 52.91 | 8.14 | 5.14  | 53.06 | 8.28 | 5.14  |
| <hr/> |                                                                       |       |      |       |       |      |       |
| 26a   | $\text{C}_{23}\text{H}_{41}\text{N}_3\text{O}_4\text{SSi}_2$          | 53.97 | 8.07 | 8.21  | 54.26 | 8.30 | 7.85  |
| <hr/> |                                                                       |       |      |       |       |      |       |
| 27    | $\text{C}_{22}\text{H}_{40}\text{N}_2\text{O}_4\text{SSi}_2$          | 54.50 | 8.32 | 5.78  | 54.87 | 8.55 | 5.84  |
| <hr/> |                                                                       |       |      |       |       |      |       |
| 28a   | $\text{C}_{15}\text{H}_{17}\text{N}_3\text{O}_6\text{S}$              | 49.04 | 4.66 | 11.44 | 49.00 | 4.53 | 11.04 |
| <hr/> |                                                                       |       |      |       |       |      |       |



|       |                                                                                     |       |      |       |       |      |       |
|-------|-------------------------------------------------------------------------------------|-------|------|-------|-------|------|-------|
| 29    | $\text{C}_{23}\text{H}_{42}\text{N}_2\text{O}_5\text{SSi}_2$                        | 53.66 | 8.22 | 5.44  | 53.85 | 8.37 | 5.40  |
| <hr/> |                                                                                     |       |      |       |       |      |       |
| 31    | $\text{C}_{16}\text{H}_{18}\text{N}_3\text{O}_6\text{S}\cdot 1/2\text{AcOEt}$       | 62.67 | 5.40 | 6.83  | 53.02 | 5.55 | 6.94  |
| <hr/> |                                                                                     |       |      |       |       |      |       |
| 32    | $\text{C}_{16}\text{H}_{18}\text{N}_2\text{O}_4\text{S}_2$                          | 52.44 | 4.95 | 7.64  | 52.71 | 5.08 | 7.48  |
| <hr/> |                                                                                     |       |      |       |       |      |       |
| 33    | $\text{C}_{10}\text{H}_{13}\text{N}_5\text{O}_4\text{S}\cdot 1/2\text{AcOMe}$       | 41.07 | 4.79 | 20.82 | 41.00 | 4.44 | 21.22 |
| <hr/> |                                                                                     |       |      |       |       |      |       |
| 34    | $\text{C}_{11}\text{H}_{16}\text{N}_2\text{O}_5\text{S}$                            | 45.82 | 5.59 | 9.72  | 45.95 | 5.57 | 9.41  |
| <hr/> |                                                                                     |       |      |       |       |      |       |
| 35    | $\text{C}_{13}\text{H}_{19}\text{N}_2\text{O}_4\text{S}$                            | 52.33 | 6.08 | 9.39  | 52.10 | 5.98 | 9.05  |
| <hr/> |                                                                                     |       |      |       |       |      |       |
| 36    | $\text{C}_{11}\text{H}_{13}\text{N}_3\text{O}_4\text{S}$                            | 46.63 | 4.63 | 14.83 | 46.70 | 4.60 | 14.47 |
| <hr/> |                                                                                     |       |      |       |       |      |       |
| 37    | $\text{C}_{12}\text{H}_{14}\text{N}_2\text{O}_4\text{S}\cdot 1/4\text{H}_2\text{O}$ | 50.25 | 5.10 | 9.77  | 50.21 | 4.96 | 9.90  |
| <hr/> |                                                                                     |       |      |       |       |      |       |
